# Supplementary material for: Linked circadian outputs control elongation growth and flowering in response to photoperiod and temperature
Source: PubMed Central journal article supplement (PMC4332151; doi:10.15252/msb.20145766), 2015-01-19

Relative Expression Level

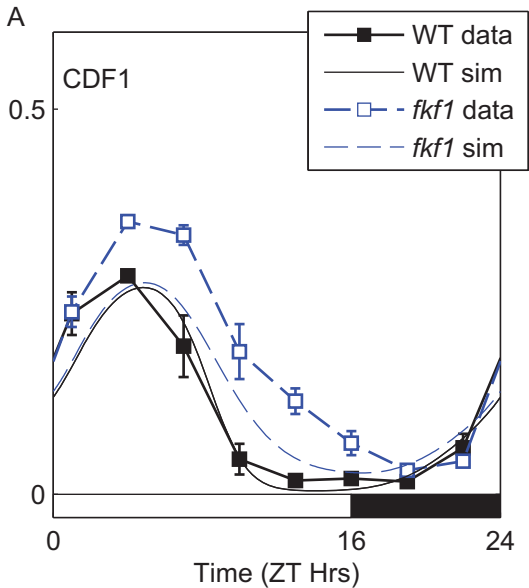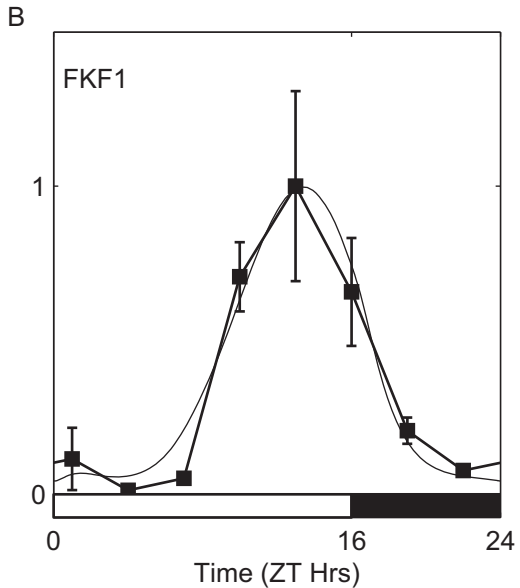

Supplement: msb0011-0776-sd4.pdf [file msb0011-0776-sd4.pdf]
