# Supplementary material for: Linked circadian outputs control elongation growth and flowering in response to photoperiod and temperature
Source: PubMed Central journal article supplement (PMC4332151; doi:10.15252/msb.20145766), 2015-01-19
Supplement: msb0011-0776-sd13.pdf [file msb0011-0776-sd13.pdf]

A

PIF-induced

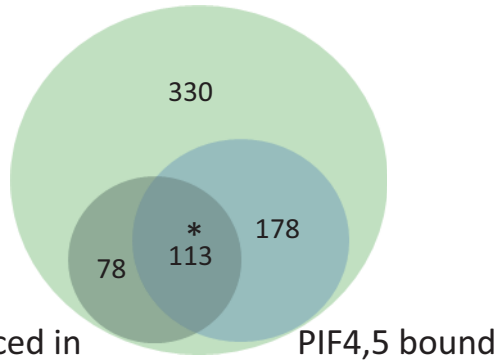

PIF-induced in  
light:dark  
cycles

PIF4,5 bound

B

PIF-repressed

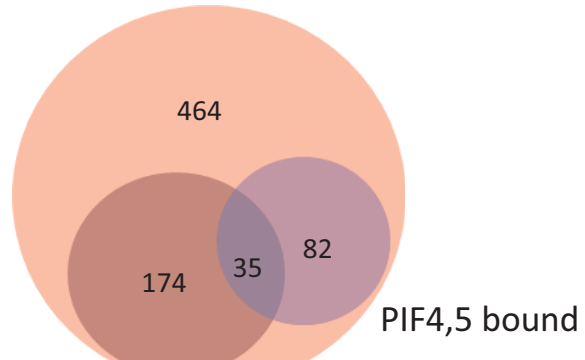

PIF-repressed  
in light:dark  
cycles

PIF4,5 bound
